# Supplementary material for: Unique Dental Morphology of Homo floresiensis and Its Evolutionary Implications
Source: PubMed Central journal article supplement (PMC4651360; doi:10.1371/journal.pone.0141614), 2015-11-18
Supplement: pone.0141614.s005.pdf [file pone.0141614.s005.pdf]

**S2 Table. Comparative *Homo sapiens* sample.**

|                                   | Remarks                                                                   | N <sup>a</sup> | Repository <sup>b</sup> |
|-----------------------------------|---------------------------------------------------------------------------|----------------|-------------------------|
| <b>Prehistoric Southeast Asia</b> |                                                                           |                |                         |
| Flores*                           | Aimere, Gua Alo, Gua Nempong, Liang Bua, Liang Momer, Liang Toge, Liang X | 9              | NBC, ARKENAS            |
| Java*                             | Hoekgrot, Wajak                                                           | 3              | NBC                     |
| Malaysia*                         | Guar Kepah                                                                | 19             | NBC                     |
| Vietnam*                          | Mai Da Dieu, Mai Da Nuoc, Hang Chim, Dong Cang, Con Co Ngua               | 73             | IAH                     |
| <b>Australia/Melanesia</b>        |                                                                           |                |                         |
| New Guinea*                       |                                                                           | 30             | AMNH, MH                |
| Australia/Tasmania Aborigine*     |                                                                           | 19             | AMNH                    |
| <b>Southeast Asia</b>             |                                                                           |                |                         |
| Philippine Negrito*               |                                                                           | 20             | MH                      |
| Others                            | Andaman, Indonesia, Malaysia, Nicobar, Philippine, Singapore, Thailand    | 57             | AMNH, MH                |
| <b>Northeast Asia</b>             |                                                                           |                |                         |
| Northeast Asia                    | China, Chukuci, Korea, Mongol, Yukagir                                    | 18             | AMNH                    |
| <b>Africa</b>                     |                                                                           |                |                         |
| Bushman                           |                                                                           | 17             | AMNH, MH                |
| African Pygmy*                    |                                                                           | 20             | MH                      |
| South Africa                      | Excluding Bushman                                                         | 26             | AMNH                    |
| East Africa                       |                                                                           | 45             | AMNH                    |
| West Africa                       | Excluding Pygmy                                                           | 55             | AMNH                    |
| <b>Indo/Europe</b>                |                                                                           |                |                         |
| India                             |                                                                           | 6              | AMNH                    |
| German                            |                                                                           | 65             | AMNH                    |
| Others                            | Hungary, Poland, Sweden                                                   | 8              | AMNH                    |
| <b>Total</b>                      |                                                                           | <b>490</b>     |                         |

\*Samples included in the EFAs.

<sup>a</sup>Number of individuals.

<sup>b</sup>NBC = Naturalis Biodiversity Center, Leiden; ARKENAS = National Research and Development Centre for Archaeology, Jakarta; AMNH = American Museum of Natural History, NY; MH = Musee de l'Homme, Paris, IAH = Institute of Archaeology, Hanoi.
