# Supplementary material for: Unique Dental Morphology of Homo floresiensis and Its Evolutionary Implications
Source: PubMed Central journal article supplement (PMC4651360; doi:10.1371/journal.pone.0141614), 2015-11-18
Supplement: pone.0141614.s006.pdf [file pone.0141614.s006.pdf]

**S3 Table. Results of the non-metric and linear metric comparisons.**

|                                                                                                                       | <i>H. habilis</i>                                                         | <i>H. erg.</i>     | Dmanisi           | eJ <i>H. erectus</i><br>(Lower, Upper) <sup>c</sup> | MP<br>East Asia                        | <i>H. sapiens</i> | <i>H. floresiensis</i><br>(status) <sup>d</sup> |                           |
|-----------------------------------------------------------------------------------------------------------------------|---------------------------------------------------------------------------|--------------------|-------------------|-----------------------------------------------------|----------------------------------------|-------------------|-------------------------------------------------|---------------------------|
| <b>Non-metric comparisons of individual teeth</b> (frequency and ratio) <sup>a</sup>                                  |                                                                           |                    |                   |                                                     |                                        |                   |                                                 |                           |
| 1                                                                                                                     | C <sub>1</sub> distal shoulder low<br>(vs. high)                          | 1/1                | –                 | –                                                   | 2/2**                                  | 1/1               | *3/109<br>3%                                    | 1/1 (EP-MP)               |
| 2                                                                                                                     | P <sup>3</sup> transverse crest present                                   | 5/11**<br>45%      | 1/5<br>20%        | 0/1                                                 | 3/9** (2/5, 1/4)<br>33%                | 1/8<br>13%        | **6/283<br>2%                                   | 1/1 (EP)                  |
| 3                                                                                                                     | P <sup>4</sup> transverse crest present                                   | 3/10**<br>30%      | 2/3**             | 1/2*                                                | 4/8** (1/4, 3/4)<br>50%                | 1/8<br>13%        | **5/279<br>2%                                   | 1/1 (EP)                  |
| 4                                                                                                                     | P <sup>3</sup> buccal groove(s) present                                   | 12/12**<br>100%    | **1/5<br>20%      | 0/1                                                 | 6/9 (4/5, 2/4)<br>67%                  | **2/6<br>33%      | **139/245<br>57%                                | 0/1 (post-Hh)             |
| 5                                                                                                                     | P <sup>4</sup> buccal groove(s) present                                   | 6/10<br>60%        | 3/3*<br>100%      | 0/2                                                 | 1/8 (0/4, 1/4)<br>12%                  | 3/6<br>50%        | 67/217<br>31%                                   | 0/1 (?)                   |
| 6                                                                                                                     | P <sup>4</sup> lingual crown MD<br>extensive                              | 8/8**<br>100%      | 1/2               | 2/2*                                                | 4/4** (2/2, 2/2)<br>100%               | *2/6<br>33%       | **33/198<br>17%                                 | 1/1 (EP)                  |
| 7                                                                                                                     | P <sub>3</sub> lingual cusp posi. mesially<br>(vs. distally)              | 9/9<br>100%        | *3/6<br>50%       | 1/2                                                 | 3/3 (2/2, 1/1)                         | 8/9<br>89%        | 163/197<br>83%                                  | 0/3 (post-Hh)             |
| 8                                                                                                                     | P <sub>4</sub> lingual cusp posi. mesially<br>(vs. centrally or distally) | 8/8<br>100%        | 4/5<br>80%        | 2/2                                                 | 6/6 (4/4, 2/2)<br>100%                 | 4/5<br>80%        | 155/211<br>73%                                  | 1/1 (?)                   |
| 9                                                                                                                     | P <sub>3</sub> mesiolingual crown<br>beveled and wrinkled                 | 0/9<br>0%          | 0/6<br>0%         | 0/2                                                 | 0/4 (0/3, 0/1)<br>0%                   | 0/9<br>0%         | 0/214<br>0%                                     | 3/3 (unique)              |
| 10                                                                                                                    | P <sub>3</sub> transverse crest present                                   | 9/9<br>100%        | 5/5<br>100%       | 2/2                                                 | 4/4 (3/3, 1/1)<br>100%                 | 7/8<br>88%        | 176/215<br>82%                                  | 3/3 (?)                   |
| 11                                                                                                                    | P <sub>4</sub> transverse crest present                                   | 0/7<br>0%          | *5/7**<br>71%     | 0/2                                                 | *4/6* (3/4, 1/2)<br>67%                | **5/6**<br>83%    | 40/220<br>18%                                   | 2/2 (post-Hh)             |
| 12                                                                                                                    | P <sub>3</sub> buccal groove(s) present                                   | 7/8**<br>87%       | 3/4<br>75%        | 0/2                                                 | 2/3 (2/2, 0/1)                         | 6/9<br>67%        | **57/170<br>34%                                 | 0/3 (?)                   |
| 13                                                                                                                    | P <sub>4</sub> buccal groove(s) present                                   | 4/6<br>67%         | 4/5*<br>80%       | 0/2                                                 | 4/5* (2/3, 2/2)<br>80%                 | 6/7**<br>86%      | 51/164<br>31%                                   | 0/1 (?)                   |
| 14                                                                                                                    | P <sub>3</sub> buccal basal enamel<br>thickened                           | 1/6*<br>17%        | 0/5<br>0%         | 1/3?*                                               | 1/3* (1/3, –)                          | 1/7*<br>14%       | *0/207<br>0%                                    | 1/3 (EP-MP)               |
| 15                                                                                                                    | P <sub>3</sub> root bifurcated<br>(vs. fused or single)                   | 4/13**<br>31%      | 2/5*<br>40%       | 1/1                                                 | 3/6** (3/6, –)<br>50%                  | 0/7<br>0%         | **26/599 <sup>e</sup><br>4%                     | 2/3 (EP)                  |
| 16                                                                                                                    | P <sub>4</sub> root bifurcated<br>(vs. fused or single)                   | 5/10**<br>50%      | 4/7**<br>57%      | –                                                   | 4/7** (4/6, 0/1)<br>57%                | 0/4<br>0%         | **15/570 <sup>e</sup><br>3%                     | 0/3 (?)                   |
| 17                                                                                                                    | M <sub>1</sub> four-cusped<br>(vs. five-cusped)                           | 0/13<br>0%         | 0/10<br>0%        | 0/2                                                 | 0/9 (0/7, 0/2)<br>0%                   | 0/14<br>0%        | 9/268<br>3%                                     | 2/2 (Hs)                  |
| 18                                                                                                                    | M <sub>2</sub> four-cusped<br>(vs. five-cusped)                           | 0/9**<br>0%        | 0/8**<br>0%       | 0/2                                                 | 0/15** (0/12, 0/3 <sup>f</sup> )<br>0% | 0/12**<br>0%      | **163/279<br>58%                                | 2/2 (Hs)                  |
| 19                                                                                                                    | M <sub>1</sub> mid-trigonid crest present                                 | 0/7<br>0%          | 1/9<br>11%        | 2/2                                                 | 4/9** (3/6, 1/3)<br>44%                | 1/9<br>11%        | 7/176<br>4%                                     | 1/1                       |
| 20                                                                                                                    | M <sub>2</sub> mid-trigonid crest present                                 | 1/7<br>14%         | 2/7<br>29%        | 1/2                                                 | 1/13 (1/10, 0/3)<br>8%                 | 0/11<br>0%        | 6/265<br>2%                                     | 1/1                       |
| <b>Metric comparisons of dentition as a whole</b> (minimum / maximum, and sample size in the lower rows) <sup>b</sup> |                                                                           |                    |                   |                                                     |                                        |                   |                                                 |                           |
| 21                                                                                                                    | Relative P <sub>3</sub> size (%)                                          | 24 / 26<br>N = 5   | 26 / 28<br>N = 3  | 26 / 27<br>N = 2                                    | (26, –)<br>N = 1, –                    | 26 / 28<br>N = 3  | 22 / 27<br>N = 188                              | 30 (unique)<br>N = 2      |
| 22                                                                                                                    | Molar size % increase:<br>M <sub>1</sub> →M <sub>2</sub>                  | +5 / +20<br>N = 7  | –2 / +11<br>N = 6 | –2 / +8<br>N = 3                                    | (+4 / +9, +4 / +7)<br>N = 3, 2         | –2 / +4<br>N = 6  | –15 / +5<br>N = 250                             | 0 / +1 (post-Hh)<br>N = 2 |
|                                                                                                                       | Molar size % increase:<br>M <sub>2</sub> →M <sub>3</sub>                  | –9 / +7<br>N = 6   | –10 / –2<br>N = 3 | –8 / +8<br>N = 2                                    | (–10 / 0, –9)<br>N = 4, 1              | –14 / 0<br>N = 5  | –15 / +14<br>N = 211                            | –9 / –6 (?)<br>N = 2      |
| 23                                                                                                                    | Alv. arcade index (Lth/Bth, %)                                            | 117 / 156<br>N = 5 | 98<br>N = 1       | 123<br>N = 2                                        | (107 / 108, –)<br>N = 2, –             | 88<br>N = 1       | –                                               | 103 / 105 (eJHe)<br>N = 2 |

<sup>a</sup>Observed frequencies and percent ratios (for those samples with  $N \geq 4$ ) as well as the results of the Fisher's exact tests for the non-metric comparisons (nos. 1–20). The asterisk(s) to the right of each frequency indicates significant difference from the *H. sapiens* sample, and that on the left significant differences from the *H. habilis* sample (\*:  $P < 0.05$ , \*\*:  $P < 0.01$ ).

<sup>b</sup>The minimum and maximum values, and sample sizes (in the lower rows) are shown for the metric comparisons (nos. 21–23).

<sup>c</sup>Frequencies for the Sangiran Lower and Upper subsamples in the parentheses.

<sup>d</sup>Morphological status of *H. floresiensis* in the parentheses: 'EP', a primitive condition shared with the Afro-Asian Early Pleistocene *Homo*; 'EP-MP', a primitive condition shared with the Afro-Asian Early Pleistocene *Homo* and the East Asian Middle-Late Pleistocene archaic *Homo*; 'post-Hh', a condition derived from *H. habilis*; 'Hs', a derived condition shared with *H. sapiens*; 'eJHe', a condition most similar to early Javanese *H. erectus*; 'unique', a unique condition restricted to *H. floresiensis*.

<sup>e</sup>Sample studied by Shields [1].

<sup>f</sup>Zanolli [2] recently suggested the presence of 4-cusped  $M_2$ s in this group.

## References

1. Shields ED. Mandibular premolar and second molar root morphological variation in modern humans: What root number can tell us about tooth morphogenesis. *Am J Phys Anthropol.* 2005; 128: 299-311.
2. Zanolli C. Additional evidence for morpho-dimensional tooth crown variation in a New Indonesian *H. erectus* sample from the Sangiran Dome (Central Java). *PLoS ONE.* 2013; 8: e67233.
